## RESEARCH ARTICLE

# Occurrence of late-apoptotic symptoms in porcine preimplantation embryos upon exposure of oocytes to perfluoroalkyl substances (PFASs) under *in vitro* meiotic maturation

Anna Leclercq<sup>1\*</sup>, Petter Ranefall<sup>2</sup>, Ylva Cecilia Björnsdotter Sjunnesson<sup>1</sup>, Ida Hallberg<sup>1</sup>

**1** Division of Reproduction, Department of Clinical Sciences & the Centre for Reproductive biology in Uppsala, Swedish University of Agricultural Sciences, Uppsala, Sweden, **2** Department of Information Technology, and SciLifeLab BiImage Informatics Facility, Uppsala University, Uppsala, Sweden

\* [anna.leclercq@slu.se](mailto:anna.leclercq@slu.se)

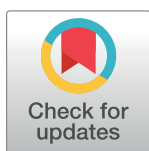

## OPEN ACCESS

**Citation:** Leclercq A, Ranefall P, Sjunnesson YCB, Hallberg I (2022) Occurrence of late-apoptotic symptoms in porcine preimplantation embryos upon exposure of oocytes to perfluoroalkyl substances (PFASs) under *in vitro* meiotic maturation. PLoS ONE 17(12): e0279551. <https://doi.org/10.1371/journal.pone.0279551>

**Editor:** Hai O. Xu, Jiangsu University, CHINA

**Received:** October 2, 2022

**Accepted:** December 9, 2022

**Published:** December 28, 2022

**Peer Review History:** PLOS recognizes the benefits of transparency in the peer review process; therefore, we enable the publication of all of the content of peer review and author responses alongside final, published articles. The editorial history of this article is available here: <https://doi.org/10.1371/journal.pone.0279551>

**Copyright:** © 2022 Leclercq et al. This is an open access article distributed under the terms of the [Creative Commons Attribution License](https://creativecommons.org/licenses/by/4.0/), which permits unrestricted use, distribution, and reproduction in any medium, provided the original author and source are credited.

**Data Availability Statement:** All relevant data are within the paper and its [Supporting Information](#) file.

## Abstract

The objectives of this study were to evaluate the effect of perfluoroalkyl substances on early embryonic development and apoptosis in blastocysts using a porcine *in vitro* model. Porcine oocytes (N = 855) collected from abattoir ovaries were subjected to perfluorooctane sulfonic acid (PFOS) (0.1 µg/ml) and perfluorohexane sulfonic acid (PFHxS) (40 µg/ml) during *in vitro* maturation (IVM) for 45 h. The gametes were then fertilized and cultured *in vitro*, and developmental parameters were recorded. After 6 days of culture, resulting blastocysts (N = 146) were stained using a terminal deoxynucleotidyl transferase dUTP nick end labeling (TUNEL) assay and imaged as stacks using confocal laser scanning microscopy. Proportion of apoptotic cells as well as total numbers of nuclei in each blastocyst were analyzed using objective image analysis. The experiment was run in 9 replicates, always with a control present. Effects on developmental parameters were analyzed using logistic regression, and effects on apoptosis and total numbers of nuclei were analyzed using linear regression. Higher cell count was associated with lower proportion of apoptotic cells, *i.e.*, larger blastocysts contained less apoptotic cells. Upon PFAS exposure during IVM, PFHxS tended to result in higher blastocyst rates on day 5 post fertilization ( $p = 0.07$ ) and on day 6 post fertilization ( $p = 0.05$ ) as well as in higher apoptosis rates in blastocysts ( $p = 0.06$ ). PFHxS resulted in higher total cell counts in blastocysts ( $p = 0.002$ ). No effects attributable to the concentration of PFOS used here was seen. These findings add to the evidence that some perfluoroalkyl substances may affect female reproduction. More studies are needed to better understand potential implications for continued development as well as for human health.

**Funding:** Funding was awarded to the following authors: YS- The Swedish Research Council for Environment, Agricultural Sciences and Spatial Planning, url: <https://formas.se/> (FORMAS grant no. 942-2015-476). IH- Stiftelsen Nils Lagerlöfs fund, url: <https://www.ksla.se/> (KSLA grant no. GFS2021-0031) PR- The BioImage Informatics Facility is funded by SciLifeLab, National Microscopy Infrastructure, url: <https://www.vr.se/om-vetenskapsradet/organisation/amnesrad-rad-och-kommitteer/radet-for-forskningens-infrastruktur.html> (grant no VR-RFI 2019-00217), and the Chan-Zuckerberg Initiative AL, YS- The Cells for Life Platform and Developmental Biology Platform at the Swedish University of Agricultural Sciences provided the IVF facilities. A scholarship was also provided by the VH faculty at the Swedish University of Agricultural Sciences (url: <https://www.slu.se/en/>). The funders had no role in study design, data collection and analysis, decision to publish, or preparation of the manuscript.

**Competing interests:** The authors have declared that no competing interests exist.

## Introduction

Infertility, defined as the inability to conceive within 12 months of actively trying, is an issue estimated to affect about ten percent of women aged 20–44 worldwide [1]. Even after medical investigation, the reason for infertility remains unknown in approximately 25–30% of cases [2, 3]. In addition to factors concerning genetics and lifestyle, the potential effects of endocrine disrupting chemicals (EDCs) on fertility has gained attention in later years [4]. Per- and polyfluoroalkyl substances (PFASs) is one group of chemicals which is of particular concern due to their widespread distribution and persistence in the environment [5]. PFASs constitute a large group of chemicals with surfactant properties that are present in commonly used products such as fire-fighting foam, textiles and packaging materials [6]. Humans are mainly subjected to PFASs via contaminated foodstuff. Inhalation of particles and direct contact are also known routes of exposure [7–9]. PFASs can be detected in blood of the general population worldwide [10–12], as well as in foetuses [13] and in ovarian follicular fluid [14]. Blood concentrations of PFASs in residents of heavily contaminated areas, and individuals subjected to occupational exposure, have been found to be substantially higher than in the general population [15, 16].

Exposure to PFASs has been associated with negative effects on health, including increased serum cholesterol levels [17, 18], decreased response to vaccines [19], and lower birth weights in children [20]. In the human general population as well as in heavily exposed groups.

Even though manufactured and used for over 50 years, potential effects of PFASs on female reproduction are incompletely understood [21, 22]. Human cohorts have shown an association between exposure and early onset of menopause [23], alterations of the menstrual cycle [24], prolonged time to pregnancy [25] and sporadic first trimester miscarriages [20].

The process of forming a healthy offspring starts with germ cells, where the female contributes with the oocyte. The quality, or developmental competence, of oocytes affect survival rates of early embryos as well as the establishment of pregnancy and subsequent development [26]. Oocyte quality is determined during the complex process of folliculogenesis. The final stages of oocyte maturation constitute a particularly sensitive period in time where critical events take place.

There is only limited information regarding potential oocyte toxicity of PFASs. In animal models, oocyte toxicity has been observed in the mouse [27] and pig [28]. It has also previously been shown that development of blastocysts is affected upon exposure during oocyte maturation in the bovine using an *in vitro* model [29].

In this study, we aimed to evaluate the effects of exposure to perfluorooctane sulfonic acid (PFOS) and perfluorohexane sulfonic acid (PFHxS) during the final stages of oocyte maturation and the consequences for the developmental competence regarding blastocyst formation using a porcine *in vitro* model.

Previously, PFOS has been associated with increased rates of apoptosis in zebrafish and xenopus embryos [30–32]. Apoptosis is commonly described as programmed cell death and can, for instance, occur as a response to toxicity [33]. In the bovine blastocyst, PFASs appear to alter genes associated with apoptotic pathways [29]. Therefore, we also wished to assess the effects of PFASs on cell count and proportion of apoptotic cells in resulting blastocysts, by using a terminal deoxynucleotidyl transferase dUTP nick end labeling (TUNEL) staining assay and objective image analysis.

## Materials and method

### Project overview

For this project, porcine oocytes obtained from abattoir ovaries were used. A total of 855 oocytes were run in nine replicates of *in vitro* embryo production according to standard

procedures. Selected oocytes were divided into three equally large groups; PFOS group, PFHxS group, and control group (range: 28–40 oocytes/group). Oocytes were matured with the addition of PFOS (0.1 µg/mL) and PFHxS (40 µg/mL) respectively, for a total of 45 h. They were then fertilized using frozen thawed semen, where the same boar was used throughout the experiment. During the culture process, cleavage rate and cleavage rate above 2 cells were recorded 48 h post fertilization (hpf).

Number of blastocysts, as well as developmental stage and grade, were documented on day 5 and 6 post fertilization (pf), respectively. On day 6 pf, blastocysts were collected to be fixated and stained using 4',6-diamidino-2-phenylindole (DAPI) and terminal deoxynucleotidyl transferase dUTP nick end labeling (TUNEL) stains to evaluate proportion apoptotic cells and cell count in blastocysts.

## Media and reagents

Porcine oocyte maturation medium (POM), porcine fertilization medium (PFM), and porcine zygote medium (PZM) were purchased from the Research Institute for the Functional Peptides, FHK Fujihura Industry Co Ltd, Osaka, Japan. Wash media and wash media with heparin were produced on site (wash media: gentamycin sulphate 10 µg/ml, L-glutamine MW 146.14 1 mM, PVA 3 µg/ml in Hepes TCM 199; wash media with heparin: heparin 20 U/ml in basic wash media). Commercial media were always pre-equilibrated for at least 2 hours in 38°C and 5.5% CO<sub>2</sub> before use. For all *in vitro* production (IVP) procedures, four-well nunclon plates were used.

## Exposure

For exposure, PFOS (potassium salt >98%, CAS 1763-23-1) and PFHxS (potassium salt >98%, CAS 355-46-4) dissolved in molecular grade water was added to the maturation media of the respective exposed groups to reach the concentration of 0.1 µg/mL (PFOS) or 40 µg/mL (PFHxS). These concentrations were chosen based on results from previous experiments [29, 34]. In the control, vehicle (molecular grade water) was added in the same volume as the stock solutions containing PFOS/PFHxS. Stock solutions were stored at 4°C protected from light during the course of the experiment. Due to persistence of the compounds used, significant degradation was not expected during storage. The stock solution concentrations of PFOS and PFHxS were validated using mass-spectrometry which is described elsewhere [29, 34].

## Collection of ovaries and maturation of oocytes

Ovaries from gilts intended for human consumption were collected at an abattoir in Uppsala, Sweden and transported (range, transportation time: 1.5–3 h) in 0.9% saline at 31°C (range 30–32°C) to the IVF laboratory. Ovaries were subsequently rinsed with 35°C NaCl (0.9%), and poured into fresh NaCl (0.9%). Follicular fluid was aspirated from follicles measuring 3–8 mm in diameter using 5 mL syringes and 20 gauge cannulas, and transferred to approximately 7–10 mL of wash media with heparin (kept at 38°C) in 25 mL tubes. Aspirated oocytes were allowed to settle to the bottom of the 25 mL tubes, and were then transferred to 60 mm petri dishes and covered with wash medium. Using stereo microscopes, oocytes with an even cytoplasm and at least two cumulus cell layers were chosen [35] and washed through three 30 mm petri dishes with wash media. Selected oocytes were randomly allocated into 3 morphologically and numerically equal groups (*i.e.* PFOS group, PFHxS group, and control group), which were kept separated and treated equally (with the exception of exposures) for the remainder of IVP including *in vitro* maturation, fixation and staining processes. For technical reasons, treatments were not blinded. Oocyte groups were washed in 460 µL of POM medium each, and

subsequently, transferred in 20  $\mu\text{L}$  to POM medium with the addition of PFOS (0.1  $\mu\text{g}/\text{mL}$ ) and PFHxS (40  $\mu\text{g}/\text{mL}$ ), respectively. For details, see previous section. The corresponding amount of sterile water (used as vehicle) was added to the control group. The POM medium used in this step was, additionally, enriched with FSH (follicle stimulating hormone, 0.05 IU/mL) (FSH Porcine, OOPA00171, Insight Biotechnology, Middlesex, United Kingdom), LH (luteinizing hormone, C = 0.05 IU/mL) (LH Protein, OOPA00173, Insight Biotechnology), and dibutyryl adenosine cyclic monophosphate (dbcAMP, 1mM) (dibutyryl-cAMP, sodium salt, 1698950, Biogems, Westlake Village, United States). Oocyte groups were matured in 5.5%  $\text{CO}_2$  and 38.5°C for 22 h. They were then transferred in 20  $\mu\text{L}$  to 480  $\mu\text{L}$  each of fresh POM medium with PFOS (0.1  $\mu\text{g}/\text{mL}$ ), PFHxS (40  $\mu\text{g}/\text{mL}$ ), and sterile water (respectively) and further matured (now without LH, FSH or dbcAMP) in 5.5%  $\text{CO}_2$  and 38.5°C for 23 hours.

### Fertilization in vitro

For all fertilizations, frozen thawed semen from the same boar, stored in plastic 0.5 mL straws, was used. Prior to each fertilization, one straw was thawed for 30 seconds in 35°C tap water. Motility of spermatozoa was controlled using a stereo microscope by putting 1 drop of thawed sperm directly on a glass slide. The semen was then poured into, and mixed with, 4 mL of PFM. Two mL of the sperm dilution was placed on top of 4 mL of room temperature single layer colloid (SLC) [36] in a centrifuge tube. The colloid and sperm were then centrifuged for 20 minutes at 300  $\times$  g. Supernatant sperm and excess fluid was disposed of, so that only a sperm pellet was left on the bottom of the centrifuge tube. The pellet was transferred to 0.75 mL of PFM. Sperm was counted in room temperature using a light microscope and a Bürcher chamber. Oocyte groups (now matured for 45 h) were washed in 480  $\mu\text{L}$ /each of PFM, and subsequently transferred (in 20  $\mu\text{L}$ /group) to 400  $\mu\text{L}$ /each of PFM, to reach a final volume of 500  $\mu\text{L}$ . Sperm dilution with adjusted concentration ( $1.2 \times 10^6$ ) was added to each oocyte group. The oocytes and spermatozoa were incubated together in 5.5%  $\text{CO}_2$  and 38.5°C for 24 h.

### Culture and assessment of embryo development

Presumed zygotes were denuded by gentle pipetting in 4-wells containing 500  $\mu\text{L}$  of wash media/well. They were then washed in 480  $\mu\text{L}$ /each of PZM, and subsequently transferred (in 20  $\mu\text{L}$ /group) to 480  $\mu\text{L}$  of PZM, with a top layer of 400  $\mu\text{L}$  of IVF oil (IVF Bioscience, Falmouth, United Kingdom), each. The zygotes were incubated in 38.5°C, 5.5%  $\text{CO}_2$  and 6%  $\text{O}_2$  for 6 days. During the culture process, embryo development parameters were assessed (see below).

Forty-eight hours after fertilization, percentage of cleaved zygotes (all) and percentage of cleaved zygotes (above 2 cells) were documented for each group. On day 5 and 6 pf (respectively) number of blastocysts, as well as stage and grade of every individual blastocyst, were documented. Stages assigned were as follows: early blastocyst, blastocyst, expanding blastocyst, and hatching blastocyst [37]. Grade scores assigned were as follows: grade 1; excellent or good quality, grade 2; fair quality, grade 3; poor quality, grade 4; dead or degenerating [37]. Half grades were used when appropriate (e.g. grade 1.5).

### Fixation and staining

On day 6 pf, blastocysts were fixated overnight in 2% paraformaldehyde at 4°C. After fixation, they were washed  $\times$  2 in phosphate buffered saline (PBS) with 0.1% polyvinyl alcohol (PVA).

A TUNEL staining kit (*In Situ* Cell Detection kit, TMR red, 12156792910, Roche, Mannheim, Germany) was used to stain apoptotic nuclei. To stain all nuclei, anti-fade mounting

medium with DAPI (Vectashield with DAPI, H-1200, Vector Laboratories, Burlingame, United States) was used. Staining procedures were executed according to the manufacturer's instructions. The groups of stained blastocysts were mounted onto black-well plates (Diagnostic microscope slides 6.7 mm, ER-208B-CE24, Thermo Scientific, Braunschweig, Germany) in 2  $\mu$ L PBS with 0.1% PVA and 2  $\mu$ L anti fade mounting medium with DAPI. Slides were sealed using cover glasses and nail polish. Sealed slides were stored in darkness and 4°C until confocal laser scanning procedures (see below).

For each staining session ( $n = 4$ ), 2 of the blastocysts (chosen randomly) were sacrificed for use as positive and negative controls for the TUNEL assay. The control blastocysts were incubated in deoxyribonuclease (DNase I, 1073395, Qiagen, Hilden, Germany) solution (0.1 UI/ $\mu$ L in tris buffer) for 1 h at 37°C in darkness, according to instructions. With the exception of the negative control not being subjected to the TUNEL reaction, controls were treated under the same circumstances as the remaining blastocysts.

### Confocal microscopy

All stained blastocysts were imaged as z-stacks with the use of a confocal microscope (LSM 800, Zeiss, Oberkochen, Germany). Section thickness was set to 2  $\mu$ m. The 20x objective as well as lasers 405 and 561 were used for all blastocysts. Snap images were captured from the positive and negative controls in both channels. Treatments were blinded during confocal laser scanning procedures and image analysis.

### Image analysis

A total of 146 embryos were included in the image analysis. An apoptotic nucleus was defined as: a nucleus within the blastocyst area, stained with both DAPI and TUNEL stains. TUNEL-positive cells were segmented and identified using a macro developed for ImageJ [38] as previously described [29]. In brief, the basis for the apoptosis segmentation was an iterative 3D version of the Per Object Ellipsefit (POE) algorithm. The original POE method computes local threshold levels for each object, where the threshold level is set to optimise the ellipse fit of the object, given that it fulfils input criteria of minimum and maximum diameters, also available in a 3D version [39]. To avoid complications with threshold settings when darker objects touches brighter objects, we developed an iterative version of the 3D POE method [29]. In brief, this version was set up as follows: first, the resulting mask from the 3D POE was kept as a "seed" image. This contained the segmented objects but eroded two voxels. Secondly, the segmented objects were masked from the raw image by making the corresponding voxels black. Subsequently, 3D POE was used to segment objects in the masked image. The resulting mask was merged with the previously segmented objects and the "seed" image was merged with the previous "seed" image. These steps were repeated until no more objects were segmented from the masked image. The objects in the resulting mask were separated using the 3D Watershed Split function [40] in ImageJ, with the combined mask as input, and the combined "seeds" as seeds. The nuclei were segmented by applying a global grey-level thresholding based on object size, SizeIntervalPrecision (SIP) [41], followed by watershed separation using the 3D Watershed Split function [40] in ImageJ, with local maxima in the 3D Distance Map of the initial threshold as seeds.

Manual validation of the automated image analysis was performed for all blastocysts by comparing the TUNEL z-stacks to the corresponding macro-derived images, and dead or degenerated embryos ( $n = 6$ ) were excluded from the analysis, resulting in 140 embryos being included in further analyses.

## Statistical analysis

Statistical analyses were conducted in RStudio for R (R i386, 4.0.5). The effect of treatment (PFOS, PFHxS) compared to control on developmental parameters (proportions of cleaved, cleaved beyond 2 cell stage and proportion of blastocysts at day 5 and 6) was calculated using mixed effect logistic regression with binary distribution (glmer model of the lme4 package). Groups were weighted for size and replicate was included as a random effect. Day 5 and 6 blastocysts were considered repeated measurements and hence only one model for blastocyst development is presented. Odds ratio (OR) < 1 indicate a negative effect of treatment.

The effect of treatment (PFOS, PFHxS) on ordinal variables (stage, grade) were analysed using cumulative link mixed-effect models (clmm model of CRAN-package). Replicate was included as a random factor. Blastocyst stages were condensed to stage 1 (early blastocyst/blastocyst) or 2 (expanded/expanded/hatching/hatched) for analysis.

Cell count and TUNEL-positive cells were log-transformed to estimate normal distribution. Generalized linear mixed models (glmer model of lme4 package) were used to calculate the effect of cell count (blastocyst size) on TUNEL-positive cells as well as the effect of treatment on cell count and TUNEL positive cells. The proportion of TUNEL positive cells were lower in blastocysts with high cell counts compared to those with lower cell counts (see Results section). Therefore, the number of nuclei was accounted for in the model of the effect of treatments (PFOS, PFHxS) on proportion of TUNEL-positive cells.

P-values < 0.05 were regarded as significant, and p-values  $\geq 0.05 < 0.1$  were regarded as tendencies.

## Results

### Developmental competence & blastocyst morphology

Of the 855 fertilized oocytes, 341 were cleaved (of which 181 beyond the 2-cell stage) 48 hpf. Further, 158 presumed blastocysts developed. Mean developmental parameters, odds ratios (OR), and p-values categorized by treatment are presented in Table 1. None of the treatments had a significant effect on cleavage rate ( $p = 0.86$  (PFHxS),  $p = 0.58$  (PFOS)), cleavage rate above the 2 cell stage ( $p = 0.84$  (PFHxS),  $p = 0.48$  (PFOS)), or blastocyst rate on day 5 pf ( $p = 0.07$  (PFHxS),  $p = 0.31$  (PFOS)). PFOS did not have an effect on blastocyst rate on day 6 pf ( $p = 0.17$ ), however PFHxS tended to result in a higher number of blastocysts on day 6 pf compared to the control group (OR: 1.56,  $p = 0.05$ ). There was no difference in developmental stage ( $p = 0.21$  (PFOS),  $p = 0.62$  (PFHxS)) nor quality grade ( $p = 0.93$  (PFOS),  $p = 0.56$  (PFHxS)) upon PFAS exposure during IVF. See Fig 1.

**Table 1. Developmental competence parameters.**

|                                         | Control     | PFHxS, 40 $\mu\text{g}/\text{mL}$ |                  |         | PFOS, 0.1 $\mu\text{g}/\text{mL}$ |                  |         |
|-----------------------------------------|-------------|-----------------------------------|------------------|---------|-----------------------------------|------------------|---------|
|                                         | Mean (SD)   | Mean (SD)                         | OR (CI)          | p-value | Mean (SD)                         | OR (CI)          | p-value |
| Cleaved                                 | 0.38 (0.09) | 0.39 (0.15)                       | 1.1 (0.78–1.54)  | 0.86    | 0.38 (0.17)                       | 1.03 (0.73–1.45) | 0.58    |
| Cleaved above 2 cell stage <sup>1</sup> | 0.59 (0.27) | 0.50 (0.23)                       | 0.86 (0.57–1.30) | 0.84    | 0.59 (0.28)                       | 0.96 (0.64–1.44) | 0.48    |
| Blastocyst day 5                        | 0.07 (0.06) | 0.12 (0.07)                       | 1.69 (0.96–3.04) | 0.07    | 0.09 (0.07)                       | 1.36 (0.75–2.49) | 0.31    |
| Blastocyst day 6                        | 0.15 (0.08) | 0.21 (0.11)                       | 1.56 (1.01–2.42) | 0.05    | 0.19 (0.09)                       | 1.37 (0.88–2.14) | 0.17    |

Means and standard deviations (SD) of developmental competence parameters upon exposure to PFASs during 45h IVF, expressed as proportions Odds ratios (OR) and 95% confidence intervals (CI) are given for each developmental parameter.

<sup>1</sup>Calculated from cleaved cell embryos 48 hpf

<https://doi.org/10.1371/journal.pone.0279551.t001>

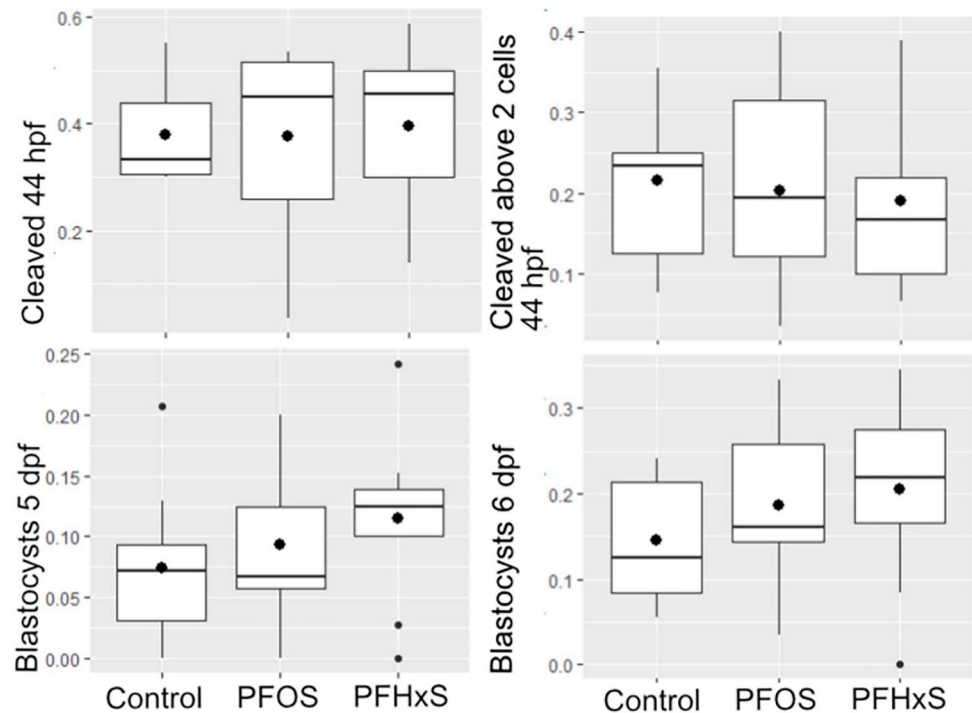

**Fig 1. Developmental competence of embryos.** Box plots over proportion of zygotes cleaved 48 hours post fertilization (hpf, top left), cleaved over the 2-cell stage 48 hpf (top right), proportion of blastocysts 5 days post fertilization (dpf, bottom left) and proportion of blastocysts 6 dpf (bottom right), categorized by treatment (PFOS: 0.1  $\mu\text{g}/\text{mL}$  PFHxS: 40  $\mu\text{g}/\text{mL}$ ).

<https://doi.org/10.1371/journal.pone.0279551.g001>

### Cell count in blastocysts upon exposure to PFAS during IVM

Embryos developed upon exposure to PFASs during IVM with no evident toxicity (see previous section) were stained to detect nuclei (DAPI) and apoptotic cells (TUNEL). The total number of nuclei in blastocysts were as follows: control group mean 35.8 (standard deviation  $\pm 17.7$ ); PFHxS group 41.0 (15.2); PFOS group 39.7 (15.6). The increased number of nuclei in embryos treated with PFHxS compared to the control was statistically significant ( $p = 0.02$ ). For PFOS, the difference was not statistically significant although a tendency was observed ( $p = 0.07$ ). See Fig 2.

### TUNEL assay

Observation of the positive and negative control blastocysts indicated that the TUNEL assay had labelled apoptotic nuclei (*i.e.* nuclei with exposed 3'-hydroxyl DNA ends) as intended. For the positive controls, the TUNEL staining pattern corresponded to the DAPI staining pattern, and for the negative controls, no stained nuclei were visible in the TUNEL channel. Furthermore, nuclei labelled by the TUNEL assay were typically shrunken/pycnotic in appearance, *i.e.* morphologically implying apoptosis (Fig 3).

### Proportion of apoptotic cells in blastocysts

Embryos containing higher total numbers of cells (*i.e.* larger blastocyst) contained a lower proportion of apoptotic cells ( $-0.13\%$ ,  $p = 0.002$ ) (Fig 4), which was accounted for in the statistical analyses.

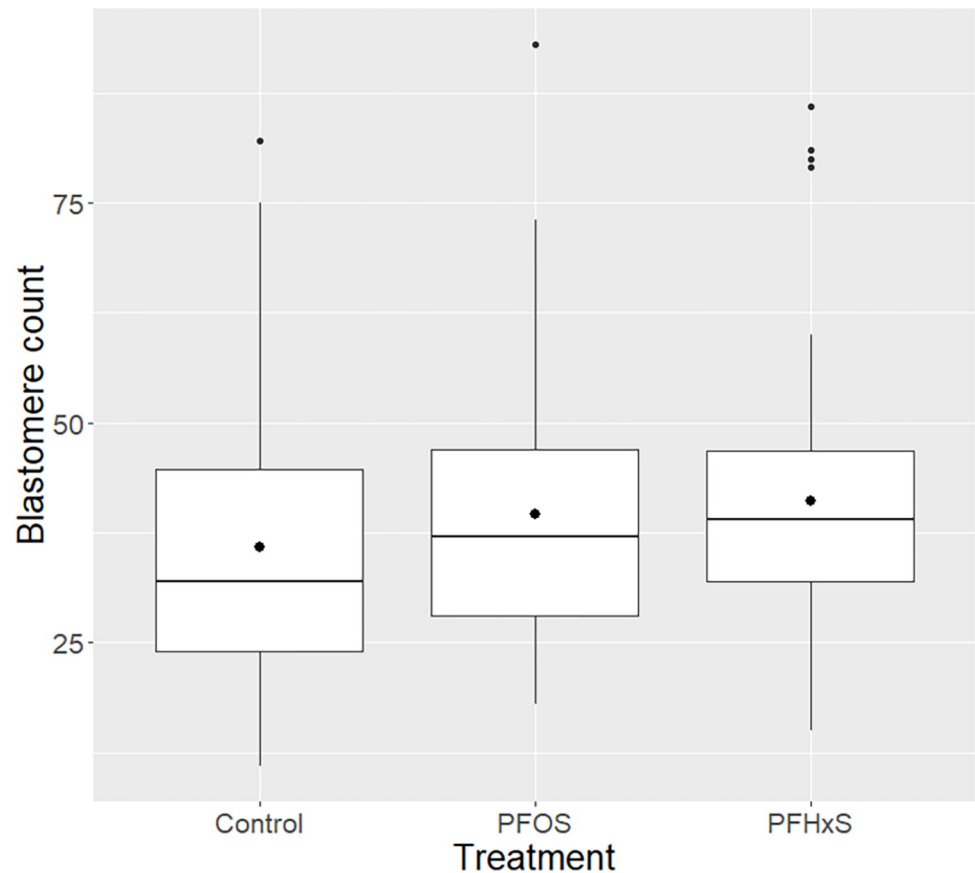

**Fig 2. Blastomere counts.** Box plot over blastomere count in blastocysts, categorized by treatment (PFOS: 0.1  $\mu\text{g}/\text{mL}$ , PFHxS: 40  $\mu\text{g}/\text{mL}$ ). There was a significantly higher number of blastomeres in blastocysts upon exposure to PFHxS during in vitro maturation ( $p = 0.02$ ), but no significant difference (although a tendency) was seen for PFOS ( $p = 0.07$ ).

<https://doi.org/10.1371/journal.pone.0279551.g002>

The proportion of apoptotic cells was 10.4% in the control group. Upon PFOS exposure during IVM, there was no significant difference in proportion of TUNEL-positive cells (12.6%,  $p = 0.19$ ). Upon PFHxS exposure, the resulting blastocysts had a tendency towards a higher proportion of TUNEL-positive cells (13.3%,  $p = 0.06$ ). See Fig 5 and Table 2.

## Discussion

In this study, porcine oocytes were exposed to PFHxS (40  $\mu\text{g}/\text{mL}$ ) and PFOS (0.1  $\mu\text{g}/\text{mL}$ ) during 48h of *in vitro* maturation. This was followed by subsequent embryo development. The concentrations used here were based on previous work within our group on bovine oocytes [29, 34]. The exposure for PFHxS was set higher than for PFOS due to presumed lower toxicity based on our previous findings in the bovine model, where altered early embryonic development upon PFOS and PFHxS exposure was seen at 0.053  $\mu\text{g}/\text{mL}$  and >10  $\mu\text{g}/\text{mL}$ , respectively [29, 34]. Additionally, earlier research suggests that shorter chained PFASs exert lower toxicity than longer chained equivalents [42].

The concentrations used in this study exceed the levels detected in the average human population. Blood levels of PFASs correlate well with levels in follicular fluid of women [12] and can therefore be used as a proxy for oocyte exposure. Blood levels of PFASs in humans vary depending on compound and geographic region [10]. In one study, median level of PFOS and PFHxS in serum were 5.38 ng/mL and 1.23 ng/mL, respectively [20]. In a second study, levels



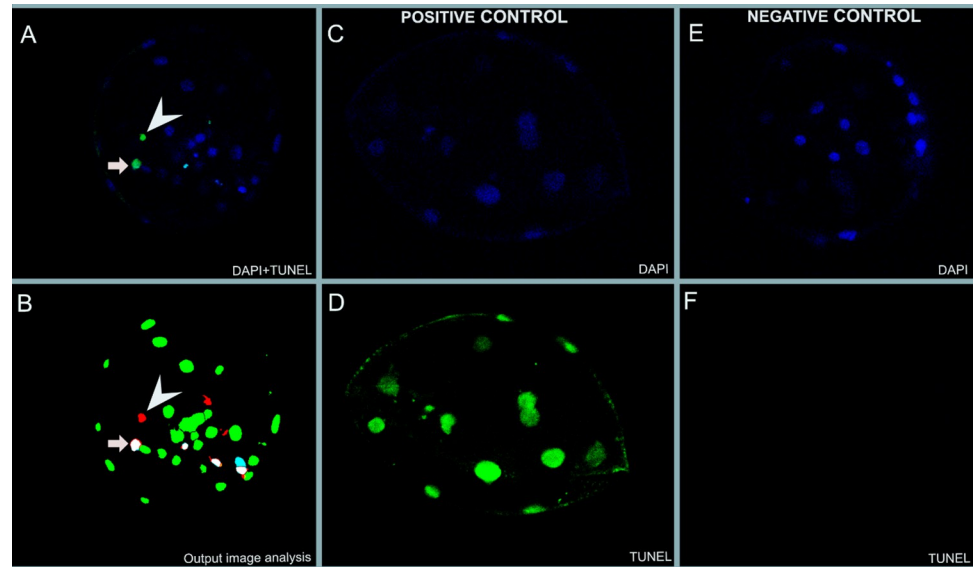

**Fig 3. Stained blastocysts.** Blastocysts stained with DAPI (blue) and TUNEL stain (green). A) shows an overlay section of a blastocyst with DAPI and TUNEL staining, arrow and arrowhead symbolize object detected with TUNEL-assay. B) represents a section of an output from the automated image analysis. Note the cell denoted as apoptotic, where TUNEL and DAPI align (white) compared to the cell where an object is positive for TUNEL, but where positive DAPI is absent (red). In this case, the cell is not annotated as apoptotic. DAPI (C, E) and TUNEL (D, F) of the positive control stained after DNase treatment and negative control with no TUNEL staining confirm TUNEL assay is labelling as intended.

<https://doi.org/10.1371/journal.pone.0279551.g003>

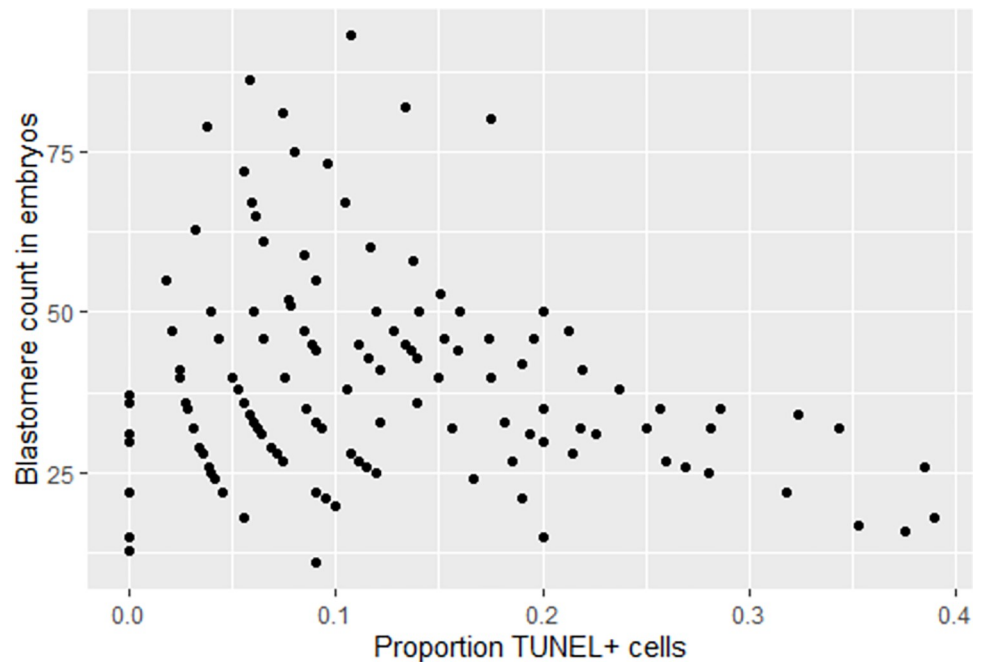

**Fig 4. TUNEL positive cells depending on blastomere count.** Scatterplot of proportion TUNEL positive cells depending on blastomere count in blastocysts. With increasing blastocyst size (increasing blastomere count), the proportion of TUNEL positive cells decrease ( $p = 0.002$ ).

<https://doi.org/10.1371/journal.pone.0279551.g004>

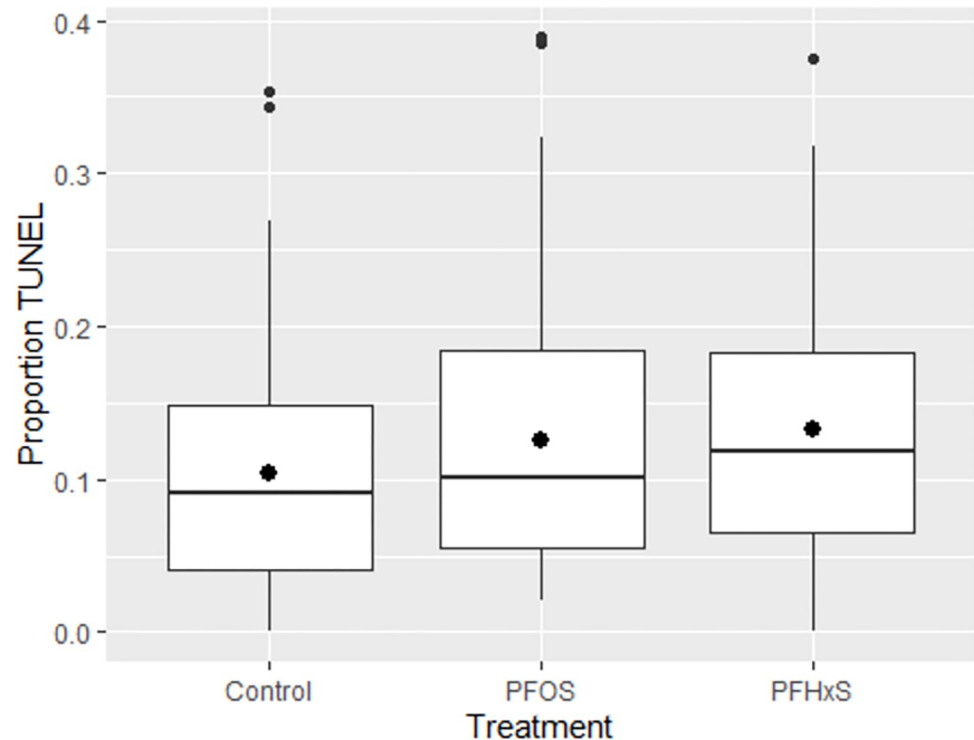

**Fig 5. TUNEL-positive cells in blastocysts.** Box plots over proportion of TUNEL-positive cells for control group, PFOS group (0.1  $\mu\text{g}/\text{mL}$ ) and PFHxS group (40  $\mu\text{g}/\text{mL}$ ).

<https://doi.org/10.1371/journal.pone.0279551.g005>

of PFOS and PFHxS in plasma ranged between 1.03–47.8 ng/mL and 0.09–8.46 ng/mL, respectively [43]. However, in heavily contaminated areas, there are reports of substantially higher concentrations in human body fluids [15]. In a cohort of industrial workers in China, some individuals showed serum levels ranging up to 19.8  $\mu\text{g}/\text{mL}$  (PFHxS) and 118  $\mu\text{g}/\text{mL}$  (PFOS) [16]. Considering the narrow window of exposure used here (oocytes were only exposed during *in vitro* maturation) and possible species differences in sensitivity towards PFASs, it cannot be precluded that findings from studies using higher concentrations may be relevant for humans in general or certainly exposed groups.

Apart from PFHxS appearing to have a positive impact on blastocyst development on day 6, the exposure used did not dramatically affect developmental competence of the oocyte or blastocyst stage/quality grade. Higher concentrations of PFHxS have been showed to inhibit maturation of porcine oocytes [44]. In the work from Martinez-Quezada [44], it was concluded that that 91.68  $\mu\text{M}$  PFHxS inhibited oocyte maturation (40  $\mu\text{g}/\text{mL}$  is equivalent to 73  $\mu\text{M}$ ).

**Table 2. Proportion of TUNEL-positive cells.**

| Treatment           | Mean proportion of apoptotic cells, (SD) | p-value |
|---------------------|------------------------------------------|---------|
| Intercept (control) | 0.104 (0.089)                            | -       |
| PFHxS               | 0.133 (0.087)                            | 0.06    |
| PFOS                | 0.126 (0.093)                            | 0.19    |

Means, standard deviations (SD) and p-values for proportion of TUNEL-positive cells in blastocysts 6 days post fertilization, upon exposure to PFHxS and PFOS. Exposure groups are compared with control group.

<https://doi.org/10.1371/journal.pone.0279551.t002>

Cytotoxic effects were seen at 329.1  $\mu\text{M}$ . Interestingly, in the bovine model, exposure to PFHxS during 22h IVM resulted in altered development already at lower concentrations. Developmental toxicity was observed from concentrations  $\geq 40 \mu\text{g/mL}$  and decreased cell count in blastocysts at concentrations  $\geq 20 \mu\text{g/mL}$  [29]. Thus, even though the porcine oocytes was exposed for a longer duration (48h of IVM), they seem less sensitive to PFHxS exposure compared to bovine oocytes.

Exposure to PFHxS during oocyte maturation resulted in a tendency towards higher blastocyst count on day 6 post fertilization and significantly increased total cell count in resulting blastocysts. In the bovine model, upon exposure levels below those causing apparent toxicity, a similar response (increased blastocyst stage) was seen. Alterations in genes related to estrogenic pathways could also be observed [29]. Additionally, PFHxS has been showed to be able to exert estrogenic effects [45]. Thus, the increase in blastocyst rate and cell count seen here could potentially be due to an estrogenous effect exerted by PFHxS, while higher concentrations of PFHxS may cause suppressed development. However, mechanisms behind the increased cell count in blastocysts upon PFHxS exposure cannot be determined using the current experimental setup.

We did not see any effects on developmental competence upon exposure to PFOS during *in vitro* maturation. This is in line with previous results seen in murine and porcine oocyte systems using similar concentrations as here [28, 46]. In bovines, slight morphological changes have been observed at lower concentrations (53 ng/mL [34]) despite the fact that bovine oocytes are generally only matured for 24 h, which further implies possible differences in sensitivity between species.

In this study, traditional IVP procedures are combined with objective image analysis. We were able to establish a method to objectively analyse TUNEL positive cells in blastocysts using automated image analysis. The method was deemed satisfactory based on manual validation. Objective methods for image analysis has the potential to make procedures more efficient and to eliminate bias that can be introduced with subjective evaluation. With the use of this method, we were able to show that overall, larger embryos contained lower proportions of apoptotic cells. This could be expected since embryos developing at a faster rate could be assumed to have a greater potential for continued growth.

In contrast to some earlier results seen in other *in vitro* systems [30, 31] no effects on apoptosis attributable to PFOS exposure were seen (as visualized in Figs 1, 2 and 5). This could potentially be explained by lower sensitivity towards PFOS in pigs compared to other species (see [discussion](#) regarding species differences above). When it comes to PFHxS, only a tendency towards increased apoptosis rate was seen. Previously, PFHxS has been linked to possible alteration of genes associated with pathways related to apoptosis and oxidative stress [29]. Although there is too little evidence to draw firm conclusions, the effect of PFASs on apoptosis should be studied further.

In this study, a porcine *in vitro* model was used to model early embryo toxicity without the use of experimental animals. Hence, the use of *in vitro* models could contribute to implementation of 3R strategies in research. Ultimately, the developmental competence of an oocyte is not proven until the birth of a healthy offspring, and the *in vitro* setting can only be used to evaluate development until the blastocyst stage. As embryos are only cultured for a limited period of time after fertilization, it is not possible to study effects of PFASs on continued development of the embryo, foetal development, or live offspring when using *in vitro* models. Furthermore, although the pig could be regarded as physiologically similar to humans when compared to e.g. rodents, the possibility of species differences in responses to PFAS exposure cannot be precluded.

## Conclusion

In summary, this study indicates that PFHxS impacts early embryonic development by increasing the total cell number in blastocysts. It is still unclear whether PFHxS impacts apoptosis rates in porcine blastocysts, and although this study adds to the evidence of a possible effect, further research is needed to be able to draw firm conclusions. The concentration of PFOS used here did not impact any of the parameters studied. However, earlier experiments have revealed negative effects on reproduction. Further studies are needed to investigate implications for continued embryonic and foetal development as well as public health.

Finally, the current research provides insightful interpretation of coming trends in assisted reproductive technologies (ARTs) targeted at recognizing the ectopic multi-functional molecular factors (PFOS and PFHxS) that represent a family of PFASs and act as endocrine disruptors, inducers of gameto- and embryotoxicity and promoters/agonists of apoptotic cell death. The use of these factors for assisted reproductive technologies can contribute to attenuation of cytological quality of porcine IVF-derived embryos by augmented incidence of TUNEL-positive (i.e., late-apoptotic) cells in the blastocysts generated under the in vitro culture conditions. The results of these investigations might be extrapolated to studies focused on the IVP of porcine and other mammalian embryos that have been generated by such innovative assisted reproductive technologies as intracytoplasmic sperm injection (ICSI)-mediated IVF [47–50] and somatic cell nuclear transfer (SCNT)-mediated cloning [51–56].

## Supporting information

**S1 File. File containing data used for statistical analysis.**  
(XLSX)

## Author Contributions

**Conceptualization:** Ylva Cecilia Björnsdotter Sjunnesson, Ida Hallberg.

**Data curation:** Anna Leclercq, Petter Ranefall, Ylva Cecilia Björnsdotter Sjunnesson.

**Formal analysis:** Anna Leclercq, Petter Ranefall, Ida Hallberg.

**Funding acquisition:** Ylva Cecilia Björnsdotter Sjunnesson, Ida Hallberg.

**Investigation:** Anna Leclercq, Ida Hallberg.

**Methodology:** Petter Ranefall, Ylva Cecilia Björnsdotter Sjunnesson, Ida Hallberg.

**Project administration:** Ylva Cecilia Björnsdotter Sjunnesson, Ida Hallberg.

**Resources:** Ylva Cecilia Björnsdotter Sjunnesson.

**Software:** Petter Ranefall.

**Supervision:** Ylva Cecilia Björnsdotter Sjunnesson, Ida Hallberg.

**Validation:** Anna Leclercq, Petter Ranefall.

**Visualization:** Anna Leclercq, Petter Ranefall.

**Writing – original draft:** Anna Leclercq.

**Writing – review & editing:** Anna Leclercq, Petter Ranefall, Ylva Cecilia Björnsdotter Sjunnesson, Ida Hallberg.

## References

1. ESHRE. ART Factsheet. 2021. Available from: <https://www.eshre.eu/Press-Room/Resources>.
2. Evers JLH. Female subfertility. *Lancet*. 2002; 360: 151–9. [https://doi.org/10.1016/S0140-6736\(02\)09417-5](https://doi.org/10.1016/S0140-6736(02)09417-5) PMID: 12126838
3. Hull MGR, Glazener MA, Kelly NJ, Conway I, Foster PA, Hinton RA, et al. Population study of causes, treatment, and outcome of infertility. *Br Med J*. 1985; 291. <https://doi.org/10.1136/bmj.291.6510.1693> PMID: 3935248
4. Bergman A, Heindel J, Jobling S, Kidd K, Zoeller RT. State-of-the-science of endocrine disrupting chemicals. Proceedings of the 48th Eurotox Congress, 17th–20th June 2012, Stockholm, Sweden. Elsevier; 2012. <https://doi.org/10.1016/j.toxlet.2012.03.020>
5. Giesy JP, Kannan K. Global distribution of perfluorooctane sulfonate in wildlife. *Environ Sci Technol*. 2001; 35: 1339–42. <https://doi.org/10.1021/es001834k> PMID: 11348064
6. Glüge J, Scheringer M, Cousins IT, Dewitt JC, Goldenman G, Herzke D, et al. An overview of the uses of per- and polyfluoroalkyl substances (PFAS). *Environ Sci Process Impacts*. 2020; 22: 2345–73. <https://doi.org/10.1039/d0em00291g> PMID: 33125022
7. Vestergren R, Berger U, Glynn A, Cousins IT. Dietary exposure to perfluoroalkyl acids for the Swedish population in 1999, 2005 and 2010. *Environ Int*. 2012; 49: 120–7. <https://doi.org/10.1016/j.envint.2012.08.016> PMID: 23018201
8. Poothong S, Papadopoulou E, Padilla-Sánchez JA, Thomsen C, Haug LS. Multiple pathways of human exposure to poly- and perfluoroalkyl substances (PFASs): From external exposure to human blood. *Environ Int*. 2020; 134. <https://doi.org/10.1016/j.envint.2019.105244> PMID: 31711019
9. DeLuca NM, Angrish M, Wilkins A, Thayer K, Cohen Hubal EA. Human exposure pathways to poly- and perfluoroalkyl substances (PFAS) from indoor media: A systematic review protocol. *Environ Int*. 2021; 146. <https://doi.org/10.1016/j.envint.2020.106308> PMID: 33395950
10. Kannan K, Corsolini S, Falandysz J, Fillmann G, Kumar KS, Loganathan BG, et al. Perfluorooctanesulfonate and related fluorochemicals in human blood from several countries. *Environ Sci Technol*. 2004; 38: 4489–95. <https://doi.org/10.1021/es0493446> PMID: 15461154
11. Calafat AM, Wong LY, Kuklennyik Z, Reidy JA, Needham LL. Polyfluoroalkyl Chemicals in the U.S. Population: Data from the National Health and Nutrition Examination Survey (NHANES) 2003–2004 and Comparisons with NHANES 1999–2000. *Environ Health Perspect*. 2007; 115: 1596–602. <https://doi.org/10.1289/ehp.10598> PMID: 18007991
12. Björvang RD, Hallberg I, Pikki A, Berglund L, Pedrelli M, Kiviranta H, et al. Follicular fluid and blood levels of persistent organic pollutants and reproductive outcomes among women undergoing assisted reproductive technologies. *Environ Res*. 2022; 208. <https://doi.org/10.1016/j.envres.2021.112626> PMID: 34973191
13. Mamsen LS, Björvang RD, Mucs D, Vinnars MT, Papadogiannakis N, Lindh CH, et al. Concentrations of perfluoroalkyl substances (PFASs) in human embryonic and fetal organs from first, second, and third trimester pregnancies. *Environ Int*. 2019; 124: 482–92. <https://doi.org/10.1016/j.envint.2019.01.010> PMID: 30684806
14. Hallberg I, Plassmann M, Olovsson M, Holte J, Damdimopoulou P, Sjunnesson YCB, et al. Suspect and non-target screening of ovarian follicular fluid and serum—identification of anthropogenic chemicals and investigation of their association to fertility. *Environ Sci Process Impacts*. 2021; 23: 1578–88. <https://doi.org/10.1039/d1em00211b> PMID: 34581388
15. Li Y, Fletcher T, Mucs D, Scott K, Lindh CH, Tallving P, et al. Half-lives of PFOS, PFHxS and PFOA after end of exposure to contaminated drinking water. *Occup Environ Med*. 2018; 75: 46–51. <https://doi.org/10.1136/oemed-2017-104651> PMID: 29133598
16. Fu J, Gao Y, Cui L, Wang T, Liang Y, Qu G, et al. Occurrence, temporal trends, and half-lives of perfluoroalkyl acids (PFAAs) in occupational workers in China. *Sci Rep*. 2016; 6. <https://doi.org/10.1038/srep38039> PMID: 27905562
17. Steenland K, Tinker S, Frisbee S, Ducatman A, Vaccarino V. Association of perfluorooctanoic acid and perfluorooctane sulfonate with serum lipids among adults living near a chemical plant. *Am J Epidemiol*. 2009; 170: 1268–78. <https://doi.org/10.1093/aje/kwp279> PMID: 19846564
18. Nelson JW, Hatch EE, Webster TF. Exposure to polyfluoroalkyl chemicals and cholesterol, body weight, and insulin resistance in the general U.S. population. *Environ Health Perspect*. 2010; 118: 197–202. <https://doi.org/10.1289/ehp.0901165> PMID: 20123614
19. Grandjean P, Andersen EW, Budtz-Jørgensen E, Nielsen F, Mølbak KR, Weihe P, et al. Serum Vaccine Antibody Concentrations in Children Exposed to Perfluorinated Compounds. *JAMA*. 2012; 307: 391–7. <https://doi.org/10.1001/jama.2011.2034> PMID: 22274686

20. Wikström S, Lin PI, Lindh CH, Shu H, Bornehag CG. Maternal serum levels of perfluoroalkyl substances in early pregnancy and offspring birth weight. *Pediatr Res.* 2020; 87: 1093–9. <https://doi.org/10.1038/s41390-019-0720-1> PMID: 31835271
21. Vestergaard S, Nielsen F, Andersson AM, Hjøllund NH, Grandjean P, Andersen HR, et al. Association between perfluorinated compounds and time to pregnancy in a prospective cohort of Danish couples attempting to conceive. *Hum Reprod.* 2012; 27: 873–80. <https://doi.org/10.1093/humrep/der450> PMID: 22246448
22. Schrenk D, Bignami M, Bodin L, Chipman JK, del Mazo J, Grasl-Kraupp B, et al. Risk to human health related to the presence of perfluoroalkyl substances in food. *EFSA J.* 2020; 18. <https://doi.org/10.2903/j.efsa.2020.6223> PMID: 32994824
23. Taylor KW, Hoffman K, Thayer KA, Daniels JL. Polyfluoroalkyl Chemicals and Menopause among Women 20–65 Years of Age (NHANES). *Environ Heal Perspect.* 2014; 122. <https://doi.org/10.1289/ehp.1306707> PMID: 24280566
24. Zhou W, Zhang L, Tong C, Fang F, Zhao S, Tian Y, et al. Plasma perfluoroalkyl and polyfluoroalkyl substances concentration and menstrual cycle characteristics in preconception women. *Environ Health Perspect.* 2017; 125. <https://doi.org/10.1289/EHP1203> PMID: 28657892
25. Fei C, McLaughlin JK, Lipworth L, Olsen J. Maternal levels of perfluorinated chemicals and subfecundity. *Hum Reprod.* 2009; 24: 1200–5. <https://doi.org/10.1093/humrep/den490> PMID: 19176540
26. Krisher RL. The effect of oocyte quality on development. *Proceedings of the Triennial Reproduction Symposium, 2003. J. Anim. Sci.* 2004; 82: E. Suppl: E14-E23.
27. Jiao X, Liu N, Xu Y, Qiao H. Perfluorononanoic acid impedes mouse oocyte maturation by inducing mitochondrial dysfunction and oxidative stress. *Reprod Toxicol.* 2021; 104: 58–67. <https://doi.org/10.1016/j.reprotox.2021.07.002> PMID: 34246765
28. Domínguez A, Salazar Z, Arenas E, Betancourt M, Ducolomb Y, González-Márquez H, et al. Effect of perfluorooctane sulfonate on viability, maturation and gap junctional intercellular communication of porcine oocytes *in vitro*. *Toxicol Vitro.* 2016; 35: 93–9. <https://doi.org/10.1016/j.tiv.2016.05.011> PMID: 27233358
29. Hallberg I, Persson S, Olovsson M, Moberg M, Ranefall P, Laskowski D, et al. Bovine oocyte exposure to perfluorohexane sulfonate (PFHxS) induces phenotypic, transcriptomic, and DNA methylation changes in resulting embryos *in vitro*. *Reprod Toxicol.* 2022; 109: 19–30. <https://doi.org/10.1016/j.reprotox.2022.02.004> PMID: 35219833
30. Shi X, Zhou B. The role of Nrf2 and MAPK pathways in PFOS-induced oxidative stress in zebrafish embryos. *Toxicol Sci.* 2010; 115: 391–400. <https://doi.org/10.1093/toxsci/kfq066> PMID: 20200220
31. Sant KE, Venezia OL, Sinno PP, Timme-Laragy AR. Perfluorobutanesulfonic Acid Disrupts Pancreatic Organogenesis and Regulation of Lipid Metabolism in the Zebrafish, *Danio rerio*. *Toxicol Sci.* 2019; 167: 258–68. <https://doi.org/10.1093/toxsci/kfy237> PMID: 30239974
32. Kim M, Son J, Park MS, Ji Y, Chae S, Jun C, et al. *In vivo* evaluation and comparison of developmental toxicity and teratogenicity of perfluoroalkyl compounds using *Xenopus* embryos. *Chemosphere.* 2013; 93: 1153–60. <https://doi.org/10.1016/j.chemosphere.2013.06.053> PMID: 23910242
33. Pistrutto G, Trisciuglio D, Ceci C, Alessia Garuffi, D'Orazi G. Apoptosis as anticancer mechanism: function and dysfunction of its modulators and targeted therapeutic strategies. *Aging (Albany NY).* 2016; 8: 603–19. <https://doi.org/10.18632/AGING.100934> PMID: 27019364
34. Hallberg I, Persson S, Olovsson M, Sirard M-A, Damdimopoulou P, Rüegg J, et al. Perfluorooctane sulfonate (PFOS) exposure of bovine oocytes affects early embryonic development at human-relevant levels in an *in vitro* model. *Toxicology.* 2021; 464. <https://doi.org/10.1016/j.tox.2021.153028>.
35. Hirao Y, Nagai T, Kubo M, Miyano T, Miyake M, Kato S. *In vitro* growth and maturation of pig oocytes. *J Reprod Fertil.* 1994; 100. <https://doi.org/10.1530/jrf.0.1000333> PMID: 8021848
36. Sjunnesson YB, Morrell JM, González R. Single layer centrifugation-selected boar spermatozoa are capable of fertilization *in vitro*. *Acta Vet Scand.* 2013; 55. <https://doi.org/10.1186/1751-0147-55-20> PMID: 23497680
37. IETS, 2010. Manual of the international embryo transfer society. In: Stringfellow, D.A., Givens, D.M. (Eds.), *A Procedural Guide and General Information for the Use of Embryotransfer Technology Emphasizing Sanitary Procedures*. International Embryo Transfer Society, 2441 Village Green Place, Champaign, Illinois 61822 USA.
38. Schneider CA, Rasband WS, Eliceiri KW. NIH Image to ImageJ: 25 years of image analysis. *Nat Methods.* 2012; 9: 671–5. <https://doi.org/10.1038/nmeth.2089> PMID: 22930834
39. Bombrun M, Ranefall P, Lindblad J, Allalou A, Partel G, Solorzano L, et al. Decoding gene expression in 2D and 3D. In: *Lecture Notes in Computer Science (including subseries Lecture Notes in Artificial*

- Intelligence and Lecture Notes in Bioinformatics). Springer Verlag; 2017. p. 257–68. [https://doi.org/10.1007/978-3-319-59129-2\\_22/FIGURES/5](https://doi.org/10.1007/978-3-319-59129-2_22/FIGURES/5)
40. Ollion J, Cochenne J, Ois Loll F, Escudé C, Boudier T. Bioimage informatics TANGO: a generic tool for high-throughput 3D image analysis for studying nuclear organization. *Bioinforma Appl NOTE*. 2013; 29: 1840–1. <https://doi.org/10.1093/bioinformatics/btt276> PMID: 23681123
  41. Ranefall P, Wählby C. Global gray-level thresholding based on object size. *Cytometry A*. 2016; 89: 385–90. <https://doi.org/10.1002/cyto.a.22806> PMID: 26800009
  42. Menger F, Pohl J, Ahrens L, Carlsson G, Örn S. Behavioural effects and bioconcentration of per- and polyfluoroalkyl substances (PFASs) in zebrafish (*Danio rerio*) embryos. *Chemosphere*. 2020; 245. <https://doi.org/10.1016/j.chemosphere.2019.125573> PMID: 31877453
  43. Zhang S, Tan R, Pan R, Xiong J, Tian Y, Wu J, et al. Association of perfluoroalkyl and polyfluoroalkyl substances with premature ovarian insufficiency in Chinese women. *J Clin Endocrinol Metab*. 2018; 103: 2543–51. <https://doi.org/10.1210/jc.2017-02783> PMID: 29986037
  44. Martínez-Quezada R, González-Castañeda G, Bahena I, Domínguez A, Domínguez-López P, Casas E, et al. Effect of perfluorohexane sulfonate on pig oocyte maturation, gap-junctional intercellular communication, mitochondrial membrane potential and DNA damage in cumulus cells in vitro. *Toxicol Vitro*. 2021; 70. <https://doi.org/10.1016/j.tiv.2020.105011> PMID: 33038467
  45. Li J, Cao H, Feng H, Xue Q, Zhang A, Fu J. Evaluation of the Estrogenic/Antiestrogenic Activities of Perfluoroalkyl Substances and Their Interactions In Vitro with the Human Estrogen Receptor by Combining In Vitro Assays and In Silico Modeling. *Cite This Environ Sci Technol*. 2020; 54: 14514–24. <https://doi.org/10.1021/acs.est.0c03468> PMID: 33111528
  46. Wei KN, Wang XJ, Zeng ZC, Gu RT, Deng SZ, Jiang J, et al. Perfluorooctane sulfonate affects mouse oocyte maturation in vitro by promoting oxidative stress and apoptosis induced by mitochondrial dysfunction. *Ecotoxicol Environ Saf*. 2021; 225. <https://doi.org/10.1016/j.ecoenv.2021.112807> PMID: 34562787
  47. Okada T, McIlpatrick S, Hin N, Aryamanesh N, Breen J, St John JC. Mitochondrial supplementation of *Sus scrofa* metaphase II oocytes alters DNA methylation and gene expression profiles of blastocysts. *Epigenetics Chromatin*. 2022; 15. <https://doi.org/10.1186/s13072-022-00442-x> PMID: 35428319
  48. Gorczyca G, Wartalski K, Romek M, Samiec M, Duda M. 2022. The Molecular Quality and Mitochondrial Activity of Porcine Cumulus-Oocyte Complexes Are Affected by Their Exposure to Three Endocrine-Active Compounds under 3D In Vitro Maturation Conditions. *Int J Mol Sci*. 2022; 23. <https://doi.org/10.3390/ijms23094572> PMID: 35562963
  49. Tsampras N., Kollmann M, Craciunas L. Recombinant versus bovine hyaluronidase for oocyte denudation before intracytoplasmic sperm injection: a systematic review and meta-analysis. *J Obstet Gynaecol*. 2022; 42: 301–5. <https://doi.org/10.1080/01443615.2021.1893670> PMID: 33938350
  50. Hernández-Pichardo JE, Ducolomb Y, Romo S, Kjelland ME, Fierro R, Casillas F, et al. Pronuclear formation by ICSI using chemically activated ovine oocytes and zona pellucida bound sperm. *J Anim Sci Biotechnol*. 2016; 7. <https://doi.org/10.1186/s40104-016-0124-6> PMID: 27826442
  51. Wiater J, Samiec M, Skrzyszowska M, Lipiński, D. Trichostatin A-Assisted Epigenomic Modulation Affects the Expression Profiles of Not Only Recombinant Human  $\alpha$ 1,2-Fucosyltransferase and  $\alpha$ -Galactosidase A Enzymes But Also Gal $\alpha$ 1 $\rightarrow$ 3Gal Epitopes in Porcine Bi-Transgenic Adult Cutaneous Fibroblast Cells. *Int J Mol Sci*. 2021; 22. <https://doi.org/10.3390/ijms22031386> PMID: 33573215
  52. Skrzyszowska M, Smorąg Z, Słomski R, Kańska-Książkiewicz L, Kalak R, Michalak E, et al. Generation of transgenic rabbits by the novel technique of chimeric somatic cell cloning. *Biol Reprod*. 2006; 74: 1114–20. <https://doi.org/10.1095/biolreprod.104.039370> PMID: 16510841
  53. Assareh N, Shahemabadi M, Varnosfaderani SR, Jafarpour F, Hajian M, Nasr-Esfahani MH. Sequential IVM by CNP preincubation and cooperating of PGE2 with AREG enhances developmental competence of SCNT reconstructs in goat. *Sci Rep*. 2022; 12. <https://doi.org/10.1038/s41598-022-08238-5> PMID: 35273320
  54. Samiec M, Skrzyszowska M. Extranuclear Inheritance of Mitochondrial Genome and Epigenetic Reprogrammability of Chromosomal Telomeres in Somatic Cell Cloning of Mammals. *Int J Mol Sci*. 2021; 22. <https://doi.org/10.3390/ijms22063099> PMID: 33803567
  55. Petersen B, Kurtz S. Generation of Pigs that Produce Single Sex Progeny. *Methods Mol Biol*. 2022; 2495: 275–93. [https://doi.org/10.1007/978-1-0716-2301-5\\_15](https://doi.org/10.1007/978-1-0716-2301-5_15) PMID: 35696039
  56. Opiela J, Samiec M, Romanek J. In vitro development and cytological quality of inter-species (porcine $\rightarrow$ bovine) cloned embryos are affected by trichostatin A-dependent epigenomic modulation of adult mesenchymal stem cells. *Theriogenology*. 2017; 97: 27–33. <https://doi.org/10.1016/j.theriogenology.2017.04.022> PMID: 28583605
